# Supplementary material for: Decrease of UPR- and ERAD-related proteins in Pichia pastoris during methanol-induced secretory insulin precursor production in controlled fed-batch cultures
Source: PubMed Central journal article supplement (PMC3930904; doi:10.1186/1475-2859-13-23), 2014-02-13

## Additional file (Vanz et al 2014)

**Table S1 - All identified intracellular proteins of *P. pastoris* X-33 classified into functional categories**

| NCBI<br>Accession-No <sup>1</sup>      | Locus ID <sup>1</sup>           | Gene name <sup>2</sup> | Protein name <sup>2</sup>                                                                  | MW<br>(kDa) <sup>3</sup> | pI <sup>6</sup> | Mascot<br>Score | Spot No <sup>4</sup>                                                                             |
|----------------------------------------|---------------------------------|------------------------|--------------------------------------------------------------------------------------------|--------------------------|-----------------|-----------------|--------------------------------------------------------------------------------------------------|
| <b>Functional category<sup>1</sup></b> |                                 |                        |                                                                                            |                          |                 |                 |                                                                                                  |
| <b>1. Metabolism</b>                   |                                 |                        |                                                                                            |                          |                 |                 |                                                                                                  |
| <b>1.1 Carbohydrate metabolism</b>     |                                 |                        |                                                                                            |                          |                 |                 |                                                                                                  |
| <b>Methanol metabolism</b>             |                                 |                        |                                                                                            |                          |                 |                 |                                                                                                  |
| <a href="#">XP_002494271</a>           | <a href="#">PAS_chr4_0821</a>   | <i>AOX1</i>            | Alcohol oxidase                                                                            | 74.5                     | 6.0             | 124             | 14*, 15*, 148*, 156* (74.5 kDa),<br>163* (~25 kDa)                                               |
| <a href="#">XP_002492075</a>           | <a href="#">PAS_chr2-2_0131</a> | <i>CTA1</i>            | Catalase A                                                                                 | 58.1                     | 6.6             | 183             | 18*                                                                                              |
| <a href="#">XP_002493065</a>           | <a href="#">PAS_chr3_0832</a>   | <i>DAS1</i>            | Transketolase (Dihydroxyacetone synthase), similar to Tkl2p                                | 79.1                     | 6.0             | 174             | 153*, 223*, 16*                                                                                  |
| <a href="#">XP_002493071</a>           | <a href="#">PAS_chr3_0841</a>   | <i>DAK</i>             | Dihydroxyacetone kinase                                                                    | 65.4                     | 5.4             | 114             | 57*, 58*                                                                                         |
| <a href="#">XP_002493270</a>           | <a href="#">PAS_chr3_1028</a>   | <i>FLD1</i>            | S-(hydroxymethyl) glutathione dehydrogenase                                                | 41.4                     | 6.1             | 81 <sup>5</sup> | 24*, 25*, 28*                                                                                    |
| <a href="#">XP_002493100</a>           | <a href="#">PAS_chr3_0867</a>   | <i>FGH1</i>            | Non-essential intracellular esterase that can function as an S-formylglutathione hydrolase | 33.4                     | 6.3             | 131             | 49*, 54*                                                                                         |
| <a href="#">XP_002493171</a>           | <a href="#">PAS_chr3_0932</a>   | <i>FDH1</i>            | NAD(+)-dependent formate dehydrogenase                                                     | 40.4                     | 6.6             | 119             | 29*, 30*, 31*, 32*, 33* (40 kDa),<br>61* (~10 kDa),<br>80*, 81* (~17 kDa),<br>87*, 89* (~30 kDa) |
| <b>Glycolysis</b>                      |                                 |                        |                                                                                            |                          |                 |                 |                                                                                                  |
| <a href="#">XP_002494228</a>           | <a href="#">PAS_chr4_0783</a>   | <i>GUT1</i>            | Glycerol kinase                                                                            | 68.8                     | 5.3             | 104             | 145*                                                                                             |

| NCBI<br>Accession-No <sup>1</sup>      | Locus ID <sup>1</sup>           | Gene name <sup>2</sup> | Protein name <sup>2</sup>                                             | MW<br>(KDa) <sup>3</sup> | pI <sup>3</sup> | Mascot<br>Score | Spot No <sup>4</sup>           |
|----------------------------------------|---------------------------------|------------------------|-----------------------------------------------------------------------|--------------------------|-----------------|-----------------|--------------------------------|
| <b>Functional category<sup>1</sup></b> |                                 |                        |                                                                       |                          |                 |                 |                                |
| <a href="#">XP_002493103</a>           | <a href="#">PAS_chr3_0868</a>   | <i>FBP1</i>            | Fructose-1,6-bisphosphatase                                           | 38.4                     | 6.1             | 118             | 41*                            |
| <a href="#">XP_002491345</a>           | <a href="#">PAS_chr2-1_0437</a> | <i>TDH1</i>            | Glyceraldehyde-3-phosphate dehydrogenase, isozyme 3                   | 35.7                     | 6.2             | 106             | 45*, 48*, 95*, 118*            |
| <a href="#">XP_002489713</a>           | <a href="#">PAS_chr1-1_0072</a> | <i>FBA1</i>            | Fructose 1,6-bisphosphate aldolase                                    | 39.9                     | 6.0             | 186             | 115*                           |
| <a href="#">XP_002490411</a>           | <a href="#">PAS_chr1-4_0292</a> | <i>PGK1</i>            | 3-Phosphoglycerate kinase                                             | 44.1                     | 7.8             | 152             | 210*, 211*                     |
| <a href="#">XP_002493191</a>           | <a href="#">PAS_chr3_0951</a>   | <i>TPI1</i>            | Triose phosphate isomerase                                            | 27.1                     | 5.7             | 244             | 112*                           |
| <a href="#">XP_002493059</a>           | <a href="#">PAS_chr3_0826</a>   | <i>GMP1</i>            | Tetrameric phosphoglycerate mutase                                    | 28.0                     | 6.0             | 165             | 65*                            |
| <a href="#">XP_002492293</a>           | <a href="#">PAS_chr3_0082</a>   | <i>ENO2</i>            | Enolase I                                                             | 46.5                     | 5.4             | 102             | 22*, 59*, 150*                 |
| <b>Ethanol metabolism</b>              |                                 |                        |                                                                       |                          |                 |                 |                                |
| <a href="#">CAY67035</a>               | <a href="#">PAS_c034_0018</a>   | <i>ADH</i>             | Alcohol dehydrogenase                                                 | 38.1                     | 6.3             | 195             | 78*                            |
| <a href="#">XP_002491382</a>           | <a href="#">PAS_chr2-1_0472</a> | <i>ADH3</i>            | Mitochondrial alcohol dehydrogenase isozyme III                       | 37.3                     | 5.8             | 145             | 42*, 44*, 55*, 93*, 96*        |
| <b>Citrate cycle (TCA cycle)</b>       |                                 |                        |                                                                       |                          |                 |                 |                                |
| <a href="#">XP_002489764</a>           | <a href="#">PAS_chr1-1_0475</a> | <i>CIT1</i>            | Citrate synthase                                                      | 51.9                     | 7.8             | 102             | 27*                            |
| <a href="#">XP_002489444</a>           | <a href="#">PAS_chr1-3_0104</a> | <i>ACO1</i>            | Aconitase                                                             | 85.0                     | 5.7             | 77              | 129*                           |
| <a href="#">XP_002491128</a>           | <a href="#">PAS_chr2-1_0238</a> | <i>MDH1</i>            | Mitochondrial malate dehydrogenase                                    | 36.5                     | 5.3             | 129             | 43*, 47*, 53*, 56*, 103*, 141* |
| <b>Pentose phosphate pathway</b>       |                                 |                        |                                                                       |                          |                 |                 |                                |
| <a href="#">XP_002492495</a>           | <a href="#">PAS_chr3_0277</a>   | <i>6PGD [GND]</i>      | 6-Phosphogluconate dehydrogenase (decarboxylating)                    | 54.2                     | 5.9             | 116             | 23*                            |
| <a href="#">XP_002491849</a>           | <a href="#">PAS_chr2-2_0337</a> | <i>TAL1</i>            | Transaldolase                                                         | 35.7                     | 5.1             | 111             | 109*                           |
| <b>Sugar metabolism and others</b>     |                                 |                        |                                                                       |                          |                 |                 |                                |
| <a href="#">XP_002490557</a>           | <a href="#">PAS_chr1-4_0426</a> | <i>BGL2</i>            | Endo-beta-1,3-glucanase                                               | 34.2                     | 4.1             | 109             | 158*                           |
| <a href="#">XP_002493105</a>           | <a href="#">PAS_chr3_0870</a>   | <i>VIG9 [PSA1]</i>     | GDP-mannose pyrophosphorylase (mannose-1-phosphate guanyltransferase) | 40.1                     | 6.0             | 95              | 215*                           |

| NCBI<br>Accession-No <sup>1</sup> | Locus ID <sup>1</sup>           | Gene name <sup>2</sup> | Protein name <sup>2</sup>                                         | MW<br>(kDa) <sup>3</sup> | pI <sup>3</sup> | Mascot<br>Score | Spot No <sup>4</sup> |
|-----------------------------------|---------------------------------|------------------------|-------------------------------------------------------------------|--------------------------|-----------------|-----------------|----------------------|
| Functional category <sup>1</sup>  |                                 |                        |                                                                   |                          |                 |                 |                      |
| <b>Pyruvate metabolism</b>        |                                 |                        |                                                                   |                          |                 |                 |                      |
| <a href="#">XP_002492397</a>      | <a href="#">PAS_chr3_0188</a>   | <i>PDC1</i>            | Major of three pyruvate decarboxylase isozymes                    | 61.5                     | 5.6             | 118             | 11*, 12*             |
| <a href="#">XP_002491703</a>      | <a href="#">PAS_chr2-1_0769</a> | <i>PYK2</i>            | Pyruvate kinase                                                   | 55.9                     | 6.1             | 190             | 161*                 |
| <b>1.2 Energy Metabolism</b>      |                                 |                        |                                                                   |                          |                 |                 |                      |
| <b>Oxidative phosphorylation</b>  |                                 |                        |                                                                   |                          |                 |                 |                      |
| <a href="#">XP_002493409</a>      | <a href="#">PAS_c131_0021</a>   | <i>[VMA2]</i>          | Vacuolar ATP synthase subunit B                                   | 55.4                     | 5.3             | 159             | 167*                 |
| <a href="#">XP_002492803</a>      | <a href="#">PAS_chr3_0576</a>   | <i>atpA</i>            | Alpha subunit of the F1 sector of mitochondrial F1F0 ATP synthase | 59.0                     | 9.1             | 76              | 52*, 66*, 125*       |
| <a href="#">XP_002492039</a>      | <a href="#">PAS_chr2-2_0165</a> | <i>atpD</i>            | Beta subunit of the F1 sector of mitochondrial F1F0 ATP synthase  | 54.0                     | 5.2             | 83              | 6*, 35*, 68*         |
| <a href="#">XP_002494179</a>      | <a href="#">PAS_chr4_0737</a>   | <i>MCR1</i>            | Mitochondrial NADH-cytochrome b5 reductase                        | 33.6                     | 8.8             | 151             | 67*                  |
| <b>1.3 Nucleotide metabolism</b>  |                                 |                        |                                                                   |                          |                 |                 |                      |
| <a href="#">XP_002492154</a>      | <a href="#">PAS_chr2-2_0059</a> | <i>YNK1</i>            | Nucleoside diphosphate kinase                                     | 17.0                     | 6.2             | 83              | 121*                 |
| <b>1.4 Amino acid metabolism</b>  |                                 |                        |                                                                   |                          |                 |                 |                      |
| <a href="#">XP_002490090</a>      | <a href="#">PAS_chr1-1_0432</a> | <i>ILV5</i>            | Acetohydroxyacid reductoisomerase                                 | 44.4                     | 7.7             | 92              | 37*                  |
| <a href="#">XP_002491046</a>      | <a href="#">PAS_chr2-1_0160</a> | <i>metE [MET6]</i>     | Cobalamin-independent methionine synthase                         | 85.9                     | 5.9             | 193             | 107*, 128*           |
| <a href="#">XP_002492638</a>      | <a href="#">PAS_chr3_0410</a>   | <i>CAR2</i>            | L-Ornithine transaminase                                          | 47.5                     | 5.9             | 249             | 200*                 |
| <a href="#">XP_002490747</a>      | <a href="#">PAS_chr1-4_0608</a> | <i>ARO8</i>            | Aromatic aminotransferase I                                       | 54.2                     | 5.4             | 172             | 165*                 |
| <a href="#">XP_002492166</a>      | <a href="#">PAS_chr2-2_0048</a> |                        | Dihydrolipoamide dehydrogenase                                    | 52.6                     | 6.3             | 113             | 13*                  |
| <a href="#">XP_002493126</a>      | <a href="#">PAS_chr3_0890</a>   | <i>SAHH</i>            | S-adenosyl-L-homocysteine hydrolase                               | 49.2                     | 5.4             | 147             | 151*                 |
| <a href="#">XP_002493112</a>      | <a href="#">PAS_chr3_0876</a>   | <i>SAM2</i>            | S-adenosylmethionine synthetase                                   | 42.6                     | 6.1             | 96              | 205*                 |

| NCBI<br>Accession-No <sup>1</sup>               | Locus ID <sup>1</sup>           | Gene name <sup>2</sup> | Protein name <sup>2</sup>                                                             | MW<br>(kDa) <sup>3</sup> | pI <sup>3</sup> | Mascot<br>Score | Spot No <sup>4</sup> |
|-------------------------------------------------|---------------------------------|------------------------|---------------------------------------------------------------------------------------|--------------------------|-----------------|-----------------|----------------------|
| <b>Functional category<sup>1</sup></b>          |                                 |                        |                                                                                       |                          |                 |                 |                      |
| <b>1.5 Metabolism of cofactors and vitamins</b> |                                 |                        |                                                                                       |                          |                 |                 |                      |
| <a href="#">XP_002493470</a>                    | <a href="#">PAS_chr4_0065</a>   | <i>THI5</i>            | Protein involved in synthesis of the thiamine precursor hydroxymethylpyrimidine (HMP) | 38.7                     | 6.3             | 94              | 46*                  |
| <a href="#">XP_002493989</a>                    | <a href="#">PAS_chr4_0550</a>   | -                      | Pyridoxine 4-dehydrogenase                                                            | 36.3                     | 5.6             | 97              | 138*                 |
| <a href="#">XP_002492875</a>                    | <a href="#">PAS_chr3_0648</a>   | <i>THI4</i>            | Thiazole synthase                                                                     | 37.3                     | 6.2             | 92              | 113*                 |
| <b>2. Genetic information processing</b>        |                                 |                        |                                                                                       |                          |                 |                 |                      |
| <b>2.1 Transcription and translation</b>        |                                 |                        |                                                                                       |                          |                 |                 |                      |
| <a href="#">XP_002491688</a>                    | <a href="#">PAS_chr2-1_0755</a> | <i>EGD2</i>            | Alpha subunit of the heteromeric nascent polypeptide-associated complex (NAC)         | 21.6                     | 4.6             | 78 <sup>5</sup> | 73*                  |
| <a href="#">XP_002489404</a>                    | <a href="#">PAS_chr1-3_0068</a> | <i>RPP0</i>            | Conserved ribosomal protein P0 similar to rat P0, human P0, and E. coli L10e          | 33.7                     | 4.6             | 128             | 72*                  |
| <a href="#">XP_002491277</a>                    | <a href="#">PAS_chr2-1_0376</a> | <i>EFB1</i>            | Putative GTPase, member of the Obg family                                             | 23.2                     | 4.3             | 122             | 108*                 |
| <a href="#">XP_002490107</a>                    | <a href="#">PAS_chr1-1_0449</a> | <i>PST2</i>            | Protein with similarity to members of a family of flavodoxin-like proteins            | 20.9                     | 6.4             | 73              | 86*                  |
| <a href="#">XP_002493447</a>                    | <a href="#">PAS_chr4_0041</a>   | -                      | Protein component of the large (60S) ribosomal subunit                                | 15.1                     | 5.8             | 86              | 94*                  |
| <a href="#">XP_002489653</a>                    | <a href="#">PAS_chr1-1_0019</a> | <i>SUB2</i>            | Component of the TREX complex required for nuclear mRNA export                        | 49.6                     | 5.4             | 91              | 166*                 |
| <a href="#">XP_002490604</a>                    | <a href="#">PAS_chr1-4_0471</a> | <i>RPS0</i>            | Protein component of the small (40S) ribosomal subunit, nearly identical to Rps0Bp    | 29.3                     | 4.6             | 72              | 71*                  |
| <a href="#">XP_002493313</a>                    | <a href="#">PAS_chr3_1071</a>   | <i>CAM1</i>            | Translation elongation factor EF-1 gamma                                              | 24.3                     | 6.4             | 104             | 78*, 137*            |
| <a href="#">XP_002493749</a>                    | <a href="#">PAS_chr4_0327</a>   | <i>GCN1</i>            | Positive regulator of the Gcn2p kinase activity, forms a complex with Gcn20p          | 30.4                     | 5.6             | 79              | 101*                 |
| <b>2.2 Sorting and degradation</b>              |                                 |                        |                                                                                       |                          |                 |                 |                      |
| <a href="#">XP_002492588</a>                    | <a href="#">PAS_chr3_0365</a>   | <i>SSC1</i>            | Mitochondrial matrix ATPase                                                           | 69.7                     | 5.4             | 152             | 106*                 |
| <a href="#">XP_002490239</a>                    | <a href="#">PAS_chr1-4_0130</a> | <i>HSP90</i>           | Heat shock protein Hsp90                                                              | 80.9                     | 4.8             | 81              | 1*, 2*               |
| <a href="#">XP_002489443</a>                    | <a href="#">PAS_chr1-3_0102</a> | <i>clpB [HSP104]</i>   | Heat shock protein that cooperates with Ydj1p (Hsp40) and Ssa1p (Hsp70)               | 100.6                    | 5.3             | 140             | 315*                 |

| NCBI<br>Accession-No <sup>1</sup>      | Locus ID <sup>1</sup>  | Gene name <sup>2</sup>   | Protein name <sup>2</sup>                                                         | MW<br>(kDa) <sup>3</sup> | pI <sup>3</sup> | Mascot<br>Score | Spot No <sup>4</sup>             |
|----------------------------------------|------------------------|--------------------------|-----------------------------------------------------------------------------------|--------------------------|-----------------|-----------------|----------------------------------|
| <b>Functional category<sup>1</sup></b> |                        |                          |                                                                                   |                          |                 |                 |                                  |
| <u>XP002494360.1</u>                   | <u>PAS_FragD_0026</u>  | <i>[CDC48]</i>           | ATPase in ER, nuclear membrane and cytosol with homology to mammalian p97         | 91.4                     | 4.8             | 108             | 146*                             |
| <u>CCA38590</u>                        | <u>PP7435Chr2-0908</u> | <i>AAP1</i>              | Aminopeptidase N                                                                  | 23.0                     | 4.7             | 142             | 316*                             |
| <u>XP_002493087</u>                    | <u>PAS_chr3_0856</u>   | <i>UBA1</i>              | Ubiquitin activating enzyme (E1)                                                  | 115.6                    | 5.0             | 142             | 325*                             |
| <b>2.3 Folding catalysts</b>           |                        |                          |                                                                                   |                          |                 |                 |                                  |
| <u>CAC33587</u>                        | <u>PAS_chr4_0844</u>   | <i>PDI</i>               | Protein disulfide isomerase                                                       | 58.1                     | 4.6             | 161             | 134*                             |
| <u>XP_002493562</u>                    | <u>PAS_chr4_0158</u>   | <i>CPNA [HSP60]</i>      | Tetradecameric mitochondrial chaperonin                                           | 60.5                     | 5.1             | 115             | 4*                               |
| <u>XP_002489608</u>                    | <u>PAS_chr1-3_0264</u> | <i>[CPR1]</i>            | Cytoplasmic peptidyl-prolyl cis-trans isomerase (cyclophilin)                     | 18.1                     | 6.1             | 99              | 92*                              |
| <u>XP_002493991</u>                    | <u>PAS_chr4_0552</u>   | <i>HSP70-HSA1 [SSA1]</i> | ATPase involved in protein folding and nuclear localization signal (NLS)-directed | 69.7                     | 4.1             | 89              | 207*                             |
| <u>XP_002492959</u>                    | <u>PAS_chr3_0731</u>   | <i>HSP70 [SSB]</i>       | Cytoplasmic ATPase that is a ribosome-associated molecular chaperone              | 66.6                     | 5.1             | 100             | 209*                             |
| <u>XP_002491027</u>                    | <u>PAS_chr2-1_0140</u> | <i>KAR2</i>              | ATPase involved in protein import into the ER                                     | 74.2                     | 4.8             | 146             | 133*                             |
| <u>XP_002492443</u>                    | <u>PAS_chr3_0230</u>   | <i>HSP70 [SSA3]</i>      | ATPase involved in protein folding and the response to stress                     | 70.9                     | 5.1             | 102             | 76* (70.9 kDa)<br>105* (~25 kDa) |
| <b>3. Cellular processes</b>           |                        |                          |                                                                                   |                          |                 |                 |                                  |
| <b>3.1 Transport and catabolism</b>    |                        |                          |                                                                                   |                          |                 |                 |                                  |
| <u>XP_002490181</u>                    | <u>PAS_chr1-4_0071</u> | <i>SOD2</i>              | Mitochondrial superoxide dismutase                                                | 25.2                     | 7.9             | 85              | 216*                             |
| <u>XP_002493819</u>                    | <u>PAS_chr4_0391</u>   | <i>[TOM40]</i>           | Component of the TOM (translocase of outer membrane) complex                      | 42.8                     | 5.6             | 78              | 36*                              |
| <u>XP_002492446</u>                    | <u>PAS_chr3_1169</u>   | <i>ACT1</i>              | Actin                                                                             | 41.9                     | 5.3             | 148             | 21*                              |
| <b>3.2 Cell growth and death</b>       |                        |                          |                                                                                   |                          |                 |                 |                                  |
| <u>XP_002490987</u>                    | <u>PAS_chr2-1_0809</u> | <i>BMH1</i>              | 14-3-3 protein homolog                                                            | 29.1                     | 4.8             | 85              | 75*                              |
| <u>XP_002492031</u>                    | <u>PAS_chr2-2_0172</u> | <i>NAP1</i>              | Protein that interacts with mitotic cyclin Clb2p                                  | 49.0                     | 4.3             | 115             | 135*                             |

| NCBI<br>Accession-No <sup>1</sup> | Locus ID <sup>1</sup>           | Gene name <sup>2</sup> | Protein name <sup>2</sup>                                                                           | MW<br>(kDa) <sup>3</sup> | pI <sup>3</sup> | Mascot<br>Score | Spot No <sup>4</sup> |
|-----------------------------------|---------------------------------|------------------------|-----------------------------------------------------------------------------------------------------|--------------------------|-----------------|-----------------|----------------------|
| Functional category <sup>1</sup>  |                                 |                        |                                                                                                     |                          |                 |                 |                      |
| <b>4. Other</b>                   |                                 |                        |                                                                                                     |                          |                 |                 |                      |
| <b>4.1 Stress response</b>        |                                 |                        |                                                                                                     |                          |                 |                 |                      |
| <a href="#">XP_002491977</a>      | <a href="#">PAS_chr2-2_0220</a> | <i>TSA1</i>            | Thioredoxin peroxidase                                                                              | 21.5                     | 4.9             | 125             | 77*                  |
| <a href="#">XP_002490091</a>      | <a href="#">PAS_chr1-1_0433</a> | <i>PRX1</i>            | Mitochondrial peroxiredoxin (1-Cys Prx) with thioredoxin peroxidase activity                        | 25.1                     | 5.7             | 142             | 82*, 111*            |
| <a href="#">BAH80186</a>          | <a href="#">PAS_chr2-2_0480</a> | <i>TRR1</i>            | Thioredoxin reductase 1                                                                             | 35.3                     | 5.5             | 93              | 225*                 |
| <a href="#">XP_002491413</a>      | <a href="#">PAS_chr2-1_0502</a> | -                      | Thiol-specific peroxiredoxin                                                                        | 19.3                     | 8.6             | 106             | 120*                 |
| <b>5. Unclassified</b>            |                                 |                        |                                                                                                     |                          |                 |                 |                      |
| <a href="#">XP_002491418</a>      | <a href="#">PAS_chr2-1_0853</a> | -                      | Hypothetical protein                                                                                | 57.0                     | 6.0             | 84              | 7*, 8*, 91*          |
| <a href="#">XP_002489760</a>      | <a href="#">PAS_chr1-1_0118</a> | -                      | Laminin subunit gamma-1                                                                             | 46.3                     | 7.0             | 73              | 142*, 157*           |
| <a href="#">XP_002491208</a>      | <a href="#">PAS_chr2-1_0313</a> | -                      | Bifunctional enzyme with alcohol dehydrogenase and glutathione-dependent formaldehyde dehydrogenase | 39.1                     | 5.8             | 92              | 38*, 39*, 40*        |
| <a href="#">XP_002490174</a>      | <a href="#">PAS_chr1-4_0063</a> | -                      | G-protein beta subunit and guanine nucleotide dissociation inhibitor for Gpa2p                      | 35.0                     | 6.3             | 104             | 116*                 |
| <a href="#">XM_002490789</a>      | <a href="#">PAS_FragB_0024</a>  | -                      | Inositol 2-dehydrogenase                                                                            | 38.0                     | 5.7             | 79              | 139*                 |

1 Accession numbers and locus IDs are according to the NCBI Reference Sequence database (<http://www.ncbi.nlm.nih.gov/RefSeq/>). Functional classifications are mostly according to KEGG PATHWAY database (<http://www.genome.jp/kegg/metabolism.html>). The data are according to databases on 01.10.12.

2 Gene/protein names are according to the sequenced genome of *P. pastoris* GS115 (<http://www.uniprot.org/>). If no name was found for *P. pastoris* GS115, a Blast search of the respective *P. pastoris* GS115 gene/protein against different *P. pastoris* strains was carried out in the following order: search against ATCC 76273 / CBS 7435 / CECT 11047 / NRRL Y-11430 / Wegner 21-1 and *P. pastoris* (yeast). Gene/protein names from other *P. pastoris* strains were only adopted in case of 100% sequence identity (<http://www.uniprot.org/>). Gene names in brackets are from *S. cerevisiae* if the names differ for both yeasts (<http://www.uniprot.org/>). The data are according to database on 01.10.12.

3 Theoretical molecular mass (MM) and isoelectric point (pI) not considering potential posttranslational modifications.

4 "Spot-No" indicates the serial number of all identified protein spots of the intracellular proteome of *P. pastoris* X-33. Proteins appearing in multiple spots indicate the existence of isoforms which probably derive from posttranslational modification events such as phosphorylation, glycosylation or limited proteolysis. Two representative 2D gels of the intracellular proteome from cell samples taken at the end of glycerol phase and after 48 hours of growth on methanol with the respective spot numbers are shown in Figure S1 A and B. Spot numbers in this table and the Figure S1 A and B are marked by an asterisk (\*) for simplified searchability. Fragments of full-length proteins, AOX1, FDH1 and SSA3, were identified and the respective Spot No and MW are indicated.

5 Score obtained from MS/MS analysis.

### Figure S1 A and B - Representative 2D gels of the intracellular proteome before and during IP production

The samples of *P. pastoris* X-33 were taken at the end of the glycerol phase (A) and after 48 h of growth on methanol (B). Spot numbers correspond to numbers in the Table S1 and are marked by an asterisk (\*) for simplified searchability.

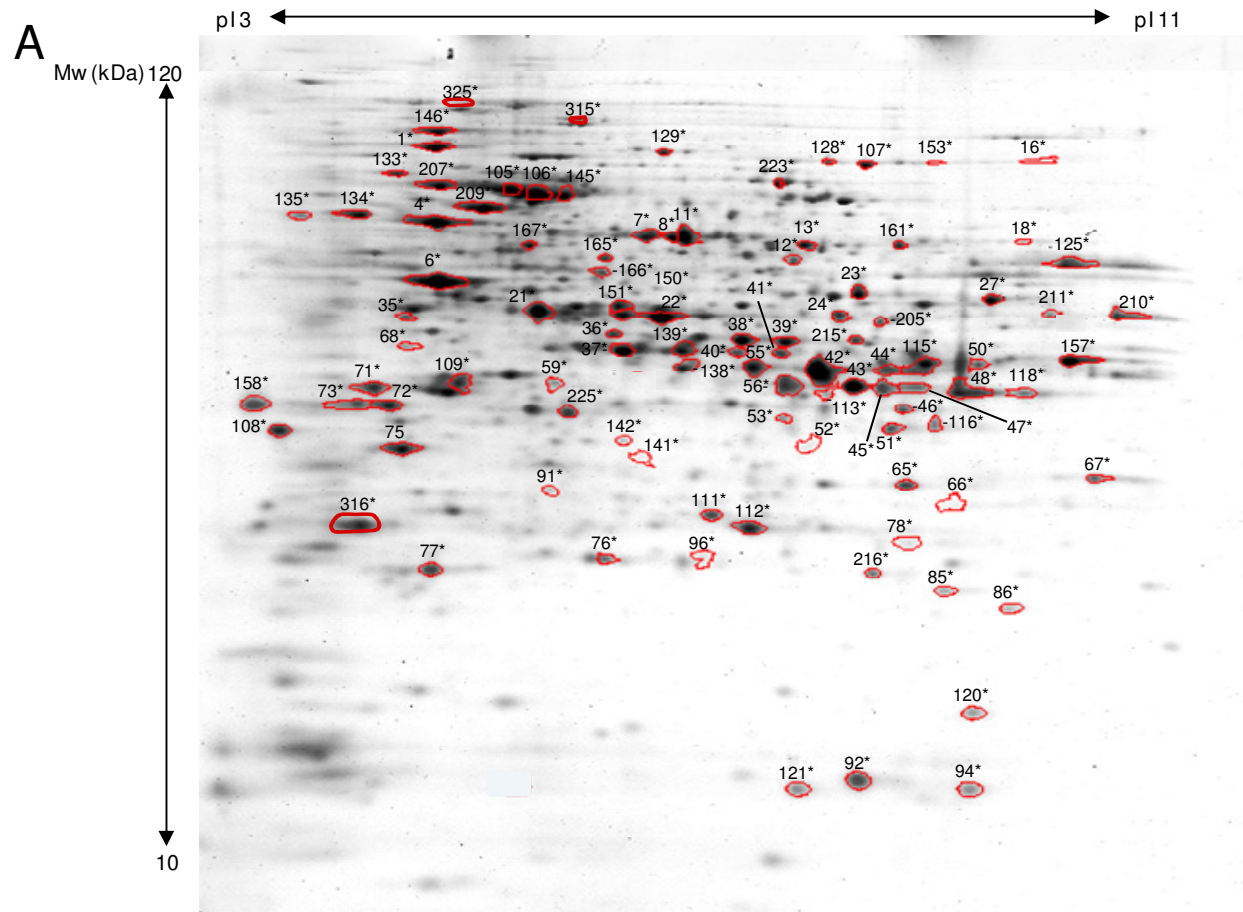

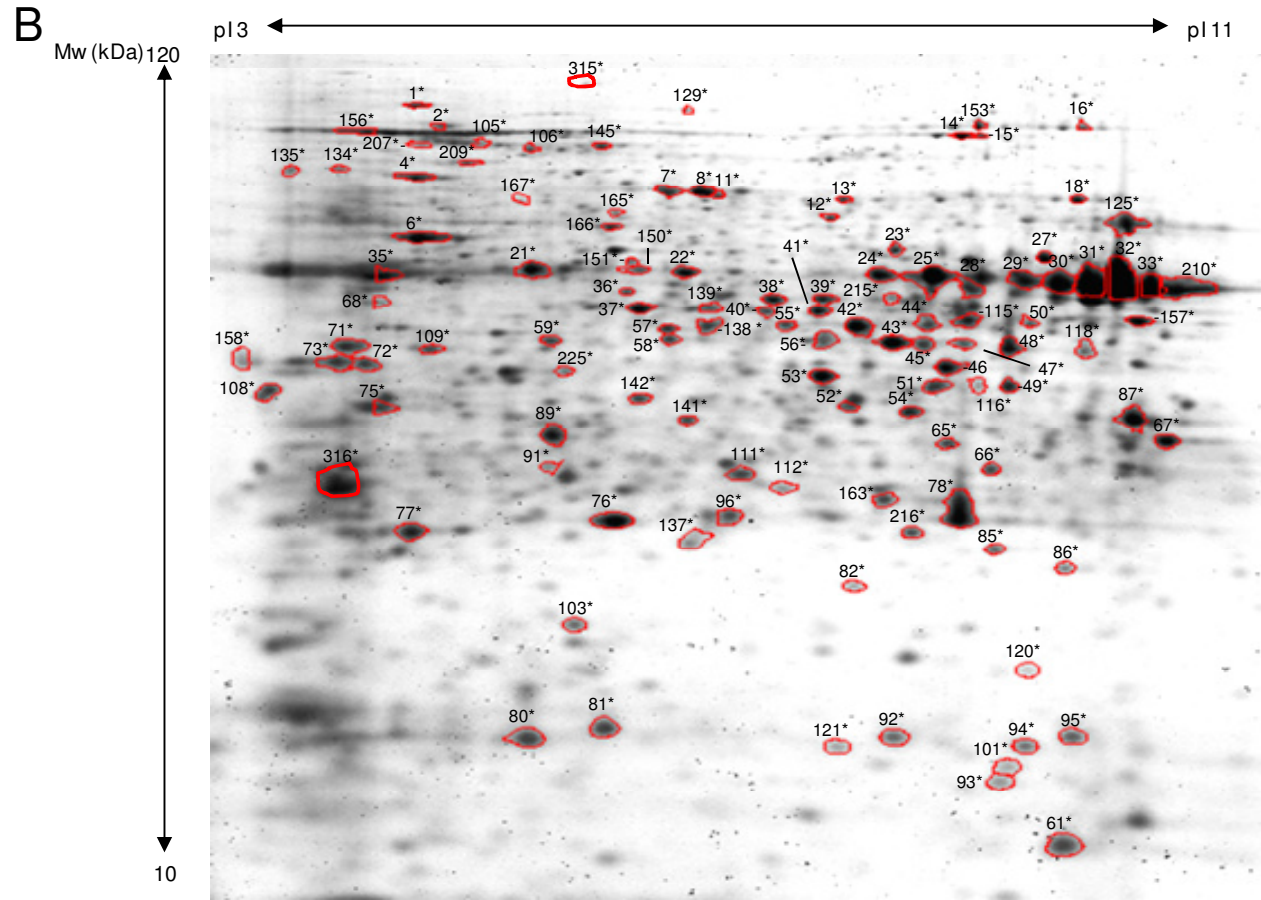



**Table S2 - Change of the intracellular proteome in response to IP production during methanol induction**

Samples before methanol addition at the end of the glycerol batch phase and 6, 18, 48 and 120 hours after the onset of methanol feeding were analyzed and the protein changes are shown (numbers. log<sub>2</sub> changes; n.a. not analyzable, color code: light orange to red, increase, light green to dark green: decrease, yellow: no significant change).

| Functional category            | Gene name <sup>1</sup>             | Gene ID         | 0h <sup>2</sup> | 6h   | 18h  | 48h  | 120h |
|--------------------------------|------------------------------------|-----------------|-----------------|------|------|------|------|
| <b>Carbohydrate metabolism</b> |                                    |                 |                 |      |      |      |      |
| Methanol metabolism            | <i>AOX1</i>                        | PAS_chr4_0821   | 0.0             | 7.4  | 9.4  | 9.2  | 9.5  |
|                                | <i>AOX1</i> (~25 kDa) <sup>3</sup> |                 | 0.0             | 7.1  | 7.1  | 8.1  | 8.1  |
|                                | <i>CTA1</i>                        | PAS_chr2-2_0131 | 0.0             | 1.7  | 2.0  | 1.5  | 2.3  |
|                                | <i>DAS1</i>                        | PAS_chr3_0832   | 0.0             | 0.1  | 0.9  | -0.1 | -0.2 |
|                                | <i>DAK</i>                         | PAS_chr3_0841   | 0.0             | n.a  | 6.5  | 8.1  | 8.7  |
|                                | <i>FLD1</i>                        | PAS_chr3_1028   | 0.0             | 9.4  | 9.9  | 10.7 | 10.8 |
|                                | <i>FGH1</i>                        | PAS_chr3_0867   | 0.0             | 7.0  | 8.4  | 8.8  | 9.0  |
|                                | <i>FDH1</i>                        | PAS_chr3_0932   | 0.0             | 10.7 | 11.6 | 12.3 | 12.3 |
|                                | <i>FDH1</i> (~30 kDa) <sup>3</sup> |                 | 0.0             | 6.2  | 8.3  | 10.1 | 10.5 |
|                                | <i>FDH1</i> (~17 kDa) <sup>3</sup> |                 | 0.0             | 0.0  | 8.1  | 9.6  | 10.5 |
|                                | <i>FDH1</i> (~10 kDa) <sup>3</sup> |                 | 0.0             | 0.0  | 7.1  | 9.3  | 9.4  |
| Glycolysis                     | <i>GUT1</i>                        | PAS_chr4_0783   | 0.0             | -0.4 | 0.1  | -1.6 | n.a  |
|                                | <i>FBP1</i>                        | PAS_chr3_0868   | 0.0             | 0.1  | 0.6  | 0.6  | 0.6  |
|                                | <i>TDH1</i>                        | PAS_chr2-1_0437 | 0.0             | 0.6  | -0.3 | -0.6 | -1.1 |
|                                | <i>FBA1</i>                        | PAS_chr1-1_0072 | 0.0             | 0.2  | -0.6 | -1.1 | -1.0 |
|                                | <i>PGK1</i>                        | PAS_chr1-4_0292 | 0.0             | -1.0 | n.a  | 1.1  | 0.4  |
|                                | <i>TPI1</i>                        | PAS_chr3_0951   | 0.0             | 0.1  | -0.4 | -2.1 | -2.2 |
|                                | <i>GMP1</i>                        | PAS_chr3_0826   | 0.0             | 0.0  | -0.2 | -0.8 | -1.1 |
|                                | <i>ENO2</i>                        | PAS_chr3_0082   | 0.0             | 0.1  | 0.0  | -1.1 | -0.8 |
| Ethanol metabolism             | <i>ADH3</i>                        | PAS_chr2-1_0472 | 0.0             | 0.0  | 0.0  | -0.7 | -0.6 |

| Functional category                         | Gene name <sup>1</sup> | Gene ID         | 0h <sup>2</sup> | 6h   | 18h  | 48h  | 120h |
|---------------------------------------------|------------------------|-----------------|-----------------|------|------|------|------|
| Citrate cycle (TCA)                         | <i>CIT1</i>            | PAS_chr1-1_0475 | 0.0             | 1.0  | 0.7  | 0.3  | 0.4  |
|                                             | <i>ACO1</i>            | PAS_chr1-3_0104 | 0.0             | 0.5  | 0.1  | -1.0 | -0.4 |
|                                             | <i>MDH1</i>            | PAS_chr2-1_0238 | 0.0             | 0.1  | -0.2 | -0.1 | 0.5  |
| Pentose phosphate pathway                   | <i>6PGD [GND]</i>      | PAS_chr3_0277   | 0.0             | 0.9  | 0.3  | -0.5 | -0.9 |
|                                             | <i>TAL1</i>            | PAS_chr2-2_0337 | 0.0             | 1.1  | 0.4  | -1.0 | -0.4 |
| Sugar metabolism                            | <i>BGL2</i>            | PAS_chr1-4_0426 | 0.0             | 0.2  | -0.1 | -1.0 | -0.9 |
|                                             | <i>VIG9 [PSA1]</i>     | PAS_chr3_0870   | 0.0             | 0.4  | -0.9 | -0.9 | n.a  |
| Pyruvate metabolism                         | <i>PDC1</i>            | PAS_chr3_0188   | 0.0             | 0.0  | -0.5 | -1.4 | -2.0 |
|                                             | <i>PYK2</i>            | PAS_chr2-1_0769 | 0.0             | 0.6  | -0.5 | -2.3 | -1.9 |
| <b>Energy metabolism</b>                    |                        |                 |                 |      |      |      |      |
| Oxidative phosphorylation                   | <i>[VMA2]</i>          | PAS_c131_0021   | 0.0             | -0.1 | -1.0 | -1.2 | -1.6 |
|                                             | <i>atpA</i>            | PAS_chr3_0576   | 0.0             | 0.8  | 0.3  | 0.4  | 1.1  |
|                                             | <i>atpD</i>            | PAS_chr2-2_0165 | 0.0             | -0.2 | 0.4  | -0.7 | 0.1  |
|                                             | <i>MCR1</i>            | PAS_chr4_0737   | 0.0             | 0.2  | 0.9  | 0.2  | 1.2  |
| <b>Nucleotide metabolism</b>                |                        |                 |                 |      |      |      |      |
|                                             | <i>YNK1</i>            | PAS_chr2-2_0059 | 0.0             | -0.2 | -0.6 | -1.0 | -1.4 |
| <b>Amino acid metabolism</b>                |                        |                 |                 |      |      |      |      |
|                                             | <i>ILV5</i>            | PAS_chr1-1_0432 | 0.0             | 0.2  | -0.1 | -0.7 | -0.1 |
|                                             | <i>metE [MET6]</i>     | PAS_chr2-1_0160 | 0.0             | 0.8  | -0.7 | n.a  | n.a  |
|                                             | <i>CAR2</i>            | PAS_chr3_0410   | 0.0             | 0.1  | -0.3 | n.a  | -0.3 |
|                                             | <i>ARO8</i>            | PAS_chr1-4_0608 | 0.0             | 1.3  | 0.6  | -0.1 | 0.5  |
|                                             | -                      | PAS_chr2-2_0048 | 0.0             | 0.6  | -0.4 | -0.7 | -0.2 |
|                                             | <i>SAHH</i>            | PAS_chr3_0890   | 0.0             | 0.0  | -0.5 | -1.6 | -0.4 |
|                                             | <i>SAM2</i>            | PAS_chr3_0876   | 0.0             | 0.9  | -0.3 | 0.4  | -0.1 |
| <b>Metabolism of cofactors and vitamins</b> |                        |                 |                 |      |      |      |      |
|                                             | -                      | PAS_chr4_0550   | 0.0             | 0.0  | -0.7 | -0.6 | -1.2 |
|                                             | <i>THI5</i>            | PAS_chr4_0065   | 0.0             | 1.5  | 2.3  | 1.0  | -0.8 |
|                                             | <i>THI4</i>            | PAS_chr3_0648   | 0.0             | 1.9  | 2.3  | 0.5  | 0.1  |

| Functional category                   | Gene name <sup>1</sup>                     | Gene ID          | 0h <sup>2</sup> | 6h   | 18h  | 48h  | 120h |
|---------------------------------------|--------------------------------------------|------------------|-----------------|------|------|------|------|
| <b>Genetic information processing</b> |                                            |                  |                 |      |      |      |      |
| Transcription and translation         | <i>EGD2</i>                                | PAS_chr2-1_0755  | 0.0             | -0.3 | -0.9 | -0.3 | -0.2 |
|                                       | <i>RPP0</i>                                | PAS_chr1-3_0068  | 0.0             | 0.7  | -0.1 | -0.4 | -0.2 |
|                                       | <i>EFB1</i>                                | PAS_chr2-1_0376  | 0.0             | -0.3 | -0.4 | -0.9 | -1.0 |
|                                       | <i>PST2</i>                                | PAS_chr1-1_0449  | 0.0             | 0.3  | 0.3  | -0.8 | -0.5 |
|                                       | -                                          | PAS_chr4_0041    | 0.0             | 0.1  | -0.4 | -0.1 | -1.0 |
|                                       | <i>SUB2</i>                                | PAS_chr1-1_0019  | 0.0             | 0.6  | 0.0  | 0.1  | 1.2  |
|                                       | <i>RPS0</i>                                | PAS_chr1-4_0471  | 0.0             | -0.3 | -0.4 | -0.2 | -2.5 |
|                                       | <i>CAM1</i>                                | PAS_chr3_1071    | 0.0             | 0.8  | 2.2  | 3.5  | 2.5  |
|                                       | <i>GCN1</i>                                | PAS_chr4_0327    | 0.0             | n.a  | 7.4  | 7.1  | 6.5  |
| Sorting and degradation               | <i>SSC1</i>                                | PAS_chr3_0365    | 0.0             | -0.3 | -1.3 | -2.6 | -1.0 |
|                                       | <i>Hps90</i>                               | PAS_chr1-4_0130  | 0.0             | -0.6 | -1.6 | -0.9 | n.a  |
|                                       | <i>clpB [HSP104]</i>                       | PAS_chr1-3_0102  | 0.0             | 0.5  | -1.2 | -2.2 | n.a  |
|                                       | <i>[CDC48]</i>                             | PAS_FragD_0026   | 0.0             | -0.5 | -1.4 | -3.6 | -3.4 |
|                                       | <i>AAP1</i>                                | PP7435_Chr2-0908 | 0.0             | -0.5 | -0.5 | -0.8 | -0.6 |
|                                       | <i>UBA1</i>                                | PAS_chr3_0856    | 0.0             | -0.5 | -1.5 | n.a  | n.a  |
|                                       | <i>PDI</i>                                 | PAS_chr4_0844    | 0.0             | -0.2 | -1.2 | -2.7 | -1.7 |
| Folding catalysts                     | <i>CPNA [HSP60]</i>                        | PAS_chr4_0158    | 0.0             | 0.0  | -0.5 | -1.5 | -0.2 |
|                                       | <i>[CPR1]</i>                              | PAS_chr1-3_0264  | 0.0             | -0.2 | -0.7 | -1.3 | -1.4 |
|                                       | <i>HSP70-HSA1 [SSA1]</i>                   | PAS_chr4_0552    | 0.0             | -0.7 | -1.5 | -2.9 | -2.9 |
|                                       | <i>HSP70 [SSB]</i>                         | PAS_chr3_0731    | 0.0             | 0.1  | -0.8 | -2.5 | -2.2 |
|                                       | <i>KAR2</i>                                | PAS_chr2-1_0140  | 0.0             | 0.1  | -1.5 | n.a  | -1.4 |
|                                       | <i>HSP70 [SSA3]</i>                        | PAS_chr3_0230    | 0.0             | -0.4 | -1.0 | -2.7 | -2.2 |
|                                       | <i>HSP70 [SSA3] (~ 25 KDa)<sup>3</sup></i> |                  | 0.0             | 0.3  | 1.4  | 1.8  | 2.4  |
|                                       | <b>Cellular processes</b>                  |                  |                 |      |      |      |      |
| Transport and catabolism              | <i>SOD2</i>                                | PAS_chr1-4_0071  | 0.0             | 0.3  | 0.0  | -0.1 | 0.2  |
|                                       | <i>[TOM]</i>                               | PAS_chr4_0391    | 0.0             | 0.4  | -0.1 | -1.0 | 1.1  |
|                                       | <i>ACT1</i>                                | PAS_chr3_1169    | 0.0             | 0.1  | 0.2  | 0.0  | -0.2 |
| Cell growth and death                 | <i>BMH1</i>                                | PAS_chr2-1_0809  | 0.0             | -0.1 | 0.0  | -0.8 | -0.9 |
|                                       | <i>NAP1</i>                                | PAS_chr2-2_0172  | 0.0             | -0.7 | -0.5 | -0.4 | -1.4 |

| Functional category | Gene name <sup>1</sup> | Gene ID         | 0h <sup>2</sup> | 6h   | 18h  | 48h  | 120h |
|---------------------|------------------------|-----------------|-----------------|------|------|------|------|
| <b>Others</b>       |                        |                 |                 |      |      |      |      |
| Stress response     | <i>TSA1</i>            | PAS_chr2-2_0220 | 0.0             | -0.2 | 0.4  | -0.1 | 0.6  |
|                     | <i>PRX1</i>            | PAS_chr1-1_0433 | 0.0             | 0.0  | 0.3  | -0.1 | 0.4  |
|                     | <i>TRR1</i>            | PAS_chr2-2_0480 | 0.0             | 0.3  | -0.1 | -1.8 | -1.2 |
|                     | -                      | PAS_chr2-1_0502 | 0.0             | 0.3  | -0.4 | -1.4 | -1.3 |
| Unclassified        | -                      | PAS_chr2-1_0853 | 0.0             | 0.5  | 0.1  | -0.1 | 0.6  |
|                     | -                      | PAS_chr1-1_0118 | 0.0             | 0.5  | -0.1 | -0.7 | -0.4 |
|                     | -                      | PAS_chr2-1_0313 | 0.0             | -0.1 | -0.3 | -0.7 | -0.3 |
|                     | -                      | PAS_chr1-4_0063 | 0.0             | 1.3  | 0.6  | 0.1  | -0.4 |
|                     | -                      | PAS_FragB_0024  | 0.0             | 0.2  | -0.4 | -1.4 | -1.2 |

- 1 Gene names in brackets are from *S. cerevisiae* if the names differ for both yeasts (<http://www.uniprot.org/>).
- 2 When no protein spot was detectable at the end of the glycerol batch phase (methanol metabolism), a virtual number of 0.001 was taken for the spot intensity to allow the calculation of log<sub>2</sub> values (spot intensities were normalized using the log<sub>2</sub> ratio of induced samples *versus* uninduced samples).
- 3 Fragments of full-length proteins, AOX1, FDH1 and SSA3, were identified and the respective log<sub>2</sub> fold changes are given

**Figure S2 A and B - Changes of the intracellular proteome of *P. pastoris* X-33 in response to secretory insulin precursor with special attention to ERAD and UPR related proteins (proteome analysis of replicate cultivation)**

(A) Sections of 2D gels representing parts of the intracellular proteome and containing most of ERAD and UPR related proteins at 0, 5, 16, and 72 h after induction with methanol. (B) Representative graphs of the normalized relative abundance changes of each protein spot shown in A. The spot related to fragment SSA3 ~25 kDa is shown in the small insert. Deviating from the initial feeding protocol for IP production, the methanol concentration in this cultivation was not raised stepwise but directly to 2 g L<sup>-1</sup>. The small map indicates the position of the 2D sections in the entire 2D gel.

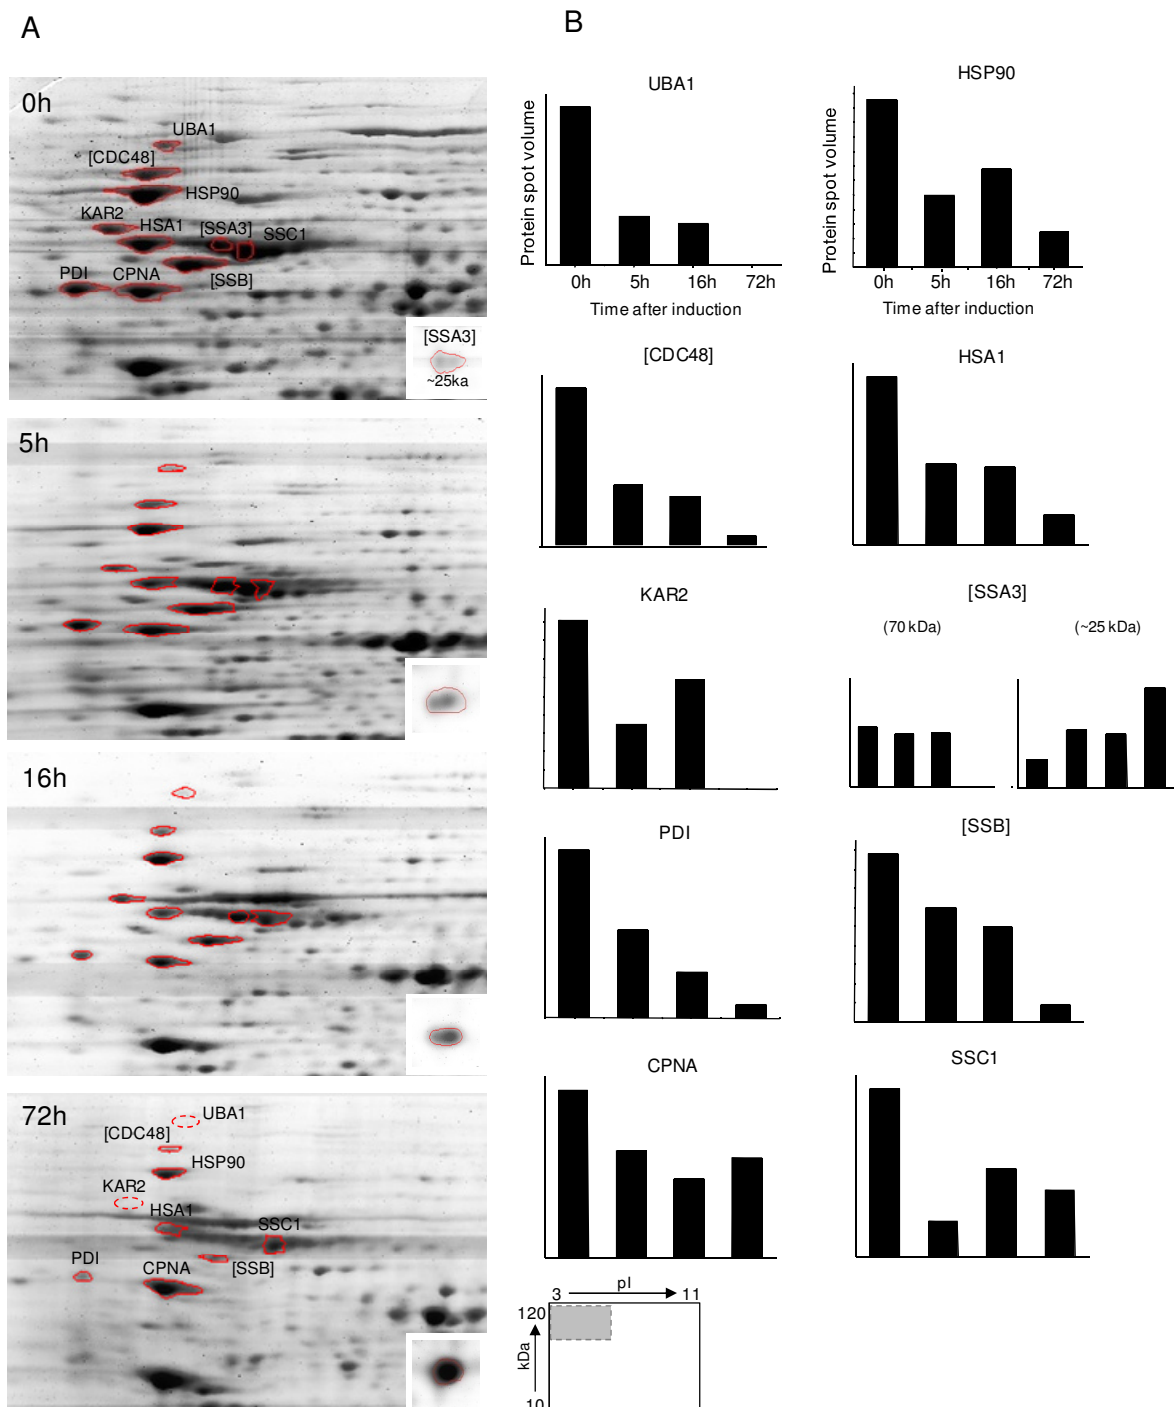

Supplement: 1475-2859-13-23-S1.pdf [file 1475-2859-13-23-S1.pdf]
